# Supplementary material
Source: PubMed Central journal article supplement (PMC6414789)
Supplement: mmc1.pdf [file mmc1.pdf]

## Aspirin Use and Respiratory Morbidity in COPD

### A Propensity Score-Matched Analysis in Subpopulations and Intermediate Outcome Measures in COPD Study

*Ashraf Fawzy, MD, MPH; Nirupama Putcha, MD, MHS; Carrie P. Aaron, MD; Russell P. Bowler, MD, PhD; Alejandro P. Comellas, MD; Christopher B. Cooper, MD; Mark T. Dransfield, MD; MeiLan K. Han, MD; Eric A. Hoffman, PhD; Richard E. Kanner, MD; Jerry A. Krishnan, MD, PhD; Wassim W. Labaki, MD; Robert Paine III, MD; Laura M. Paulin, MD, MHS; Stephen P. Peters, MD, PhD; Robert Wise, MD; R. Graham Barr, MD, DrPH; and Nadia N. Hansel, MD, MPH; on behalf of the SPIROMICS Investigators*

CHEST 2019; 155(3):519-527

*Online supplements are not copyedited prior to posting and the author(s) take full responsibility for the accuracy of all data.*

© 2018 AMERICAN COLLEGE OF CHEST PHYSICIANS. Reproduction of this article is prohibited without written permission from the American College of Chest Physicians. See online for more details. DOI: 10.1016/j.chest.2018.11.028

**e-Table 1:** Institutional Review Board (IRB) committee name and approval number at each SPIROMICS center

| <b>SPIROMICS Center</b>                | <b>Institutional Review Board Committee Name</b>           | <b>Approval Number</b>   |
|----------------------------------------|------------------------------------------------------------|--------------------------|
| Columbia University                    | Columbia University IRB 2                                  | IRB-AAAE9315             |
| University of Iowa                     | University of Iowa Hawk IRB-01                             | 201308719                |
| Johns Hopkins University               | Johns Hopkins IRB-5                                        | NA_00035701 / CR00018131 |
| University of California Los Angeles   | UCLA Medical IRB 1 (MIRB1).                                | 10001740                 |
| University of Michigan                 | University of Michigan IRBMED B1 Board                     | HUM00036346              |
| National Jewish Health                 | National Jewish Health Institutional Review board          | 19970                    |
| University of California San Francisco | UCSF IRB Parnassus Panel                                   | 10-03169                 |
| Temple University                      | Temple University IRB A2                                   | 21416                    |
| University of Alabama at Birmingham    | U of Alabama at Birmingham IRB #2                          | 120906004                |
| University of Illinois                 | University of Illinois Institutional Review Board (IRB) #3 | 2013-0939                |
| University of Utah                     | University of Utah IRB Panel Review Board 5                | 00027298                 |
| Wake Forest University                 | Wake Forest University IRB #5                              | 00012805                 |
